# Supplementary material for: Sulfur antisite-induced intrinsic high-temperature ferromagnetism in Ag2S:Y nanocrystals
Source: Royal Society of Chemistry journal article supplement (doi:10.1039/c5cp07690k), 2016-01-01
Supplement: c5cp07690k1.pdf [file c5cp07690k1.pdf]

## Supporting Information

### Sulfur-antisite induced intrinsic high-temperature ferromagnetism in $\text{Ag}_2\text{S}:\text{Y}$ nanocrystals

Pan Wang, Tianye Yang, Rui Zhao and Mingzhe Zhang\*

State Key Laboratory of Superhard Materials

Jilin University

Changchun 130012, China

\*E-mail: zhangmz@jlu.edu.cn

#### 1. EDS analysis of monoclinic $\text{Ag}_2\text{S}:\text{Y}$ nanocrystals

As we can see from Figure S1-4 and Table S1-4 of energy-dispersive X-ray spectroscopy (EDS) analysis, Y contents are about 0.41 atom%, 0.55 atom%, 0.64 atom%, and 0.88 atom% for the 0.12, 0.16, 0.18, and 0.20 of the molar ratio of  $\text{Y}^{3+}$  and  $\text{Ag}^+$  in the reaction solution, respectively, respectively.

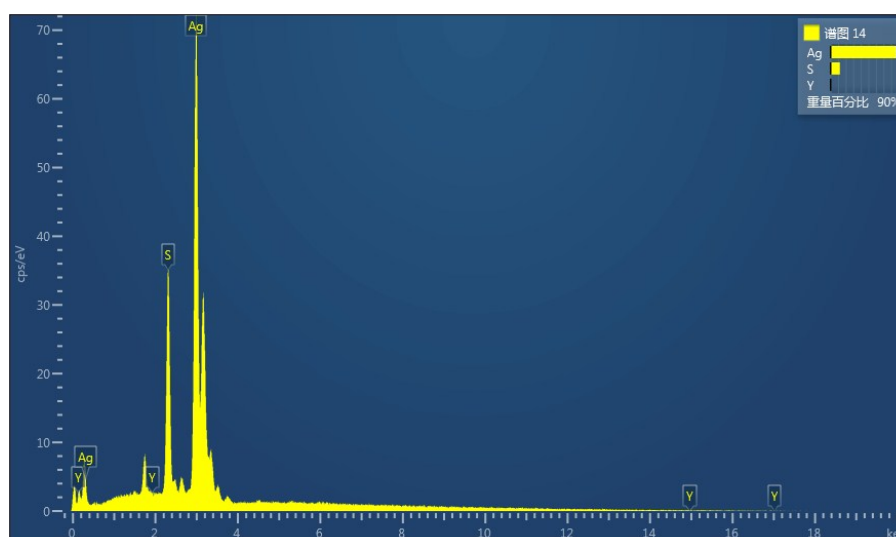

**Figure S1.** EDS spectrum of the monoclinic  $\text{Ag}_2\text{S}:\text{Y}$  nanocrystals for the 0.12 molar ratio of  $\text{Y}^{3+}$  and  $\text{Ag}^+$  in the reaction solution.

**Table S1.** Element content percentage of the monoclinic Ag<sub>2</sub>S:Y nanocrystals for the 0.12 molar ratio of Y<sup>3+</sup> and Ag<sup>+</sup> in the reaction solution.

| Element | Weight (%) | Atom (%) |
|---------|------------|----------|
| S       | 12.36      | 32.15    |
| Y       | 0.43       | 0.41     |
| Ag      | 87.21      | 67.44    |
| Total   | 100.00     | 100.00   |

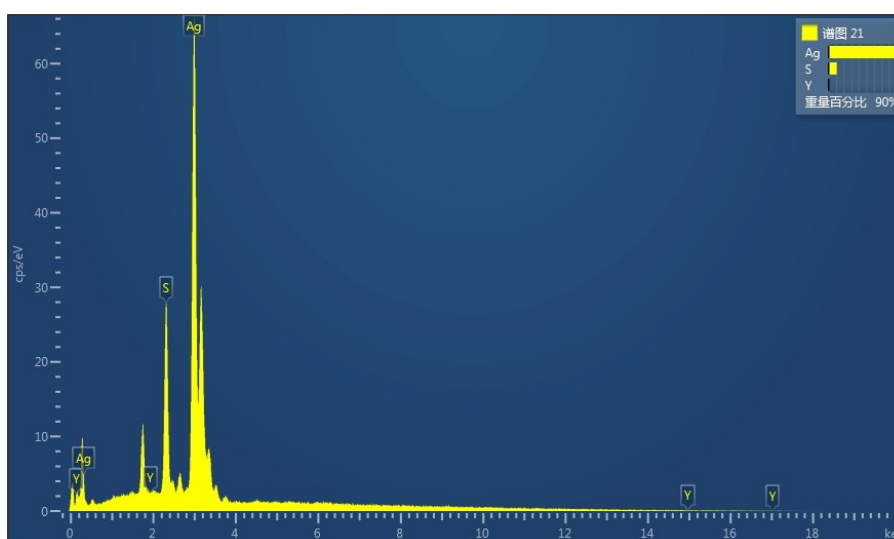

**Figure S2.** EDS spectrum of the monoclinic Ag<sub>2</sub>S:Y nanocrystals for the 0.16 molar ratio of Y<sup>3+</sup> and Ag<sup>+</sup> in the reaction solution.

**Table S2.** Element content percentage of the monoclinic Ag<sub>2</sub>S:Y nanocrystals for the 0.16 molar ratio of Y<sup>3+</sup> and Ag<sup>+</sup> in the reaction solution.

| Element | Weight (%) | Atom (%) |
|---------|------------|----------|
| S       | 10.82      | 28.95    |
| Y       | 0.57       | 0.55     |
| Ag      | 88.61      | 70.50    |
| Total   | 100.00     | 100.00   |

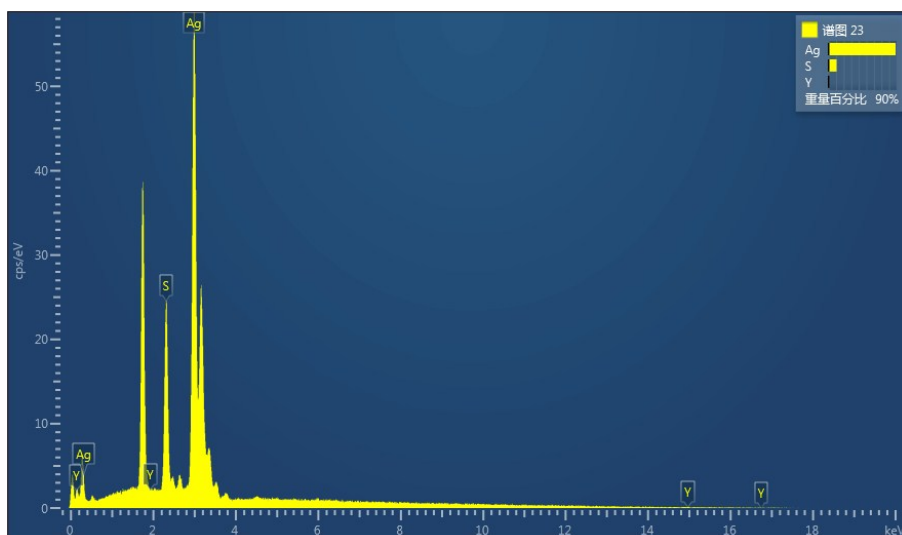

**Figure S3.** EDS spectrum of the monoclinic  $\text{Ag}_2\text{S}:\text{Y}$  nanocrystals for the 0.18 molar ratio of  $\text{Y}^{3+}$  and  $\text{Ag}^+$  in the reaction solution.

**Table S3.** Element content percentage of the monoclinic  $\text{Ag}_2\text{S}:\text{Y}$  nanocrystals for the 0.18 molar ratio of  $\text{Y}^{3+}$  and  $\text{Ag}^+$  in the reaction solution.

| Element | Weight (%) | Atom (%) |
|---------|------------|----------|
| S       | 10.77      | 28.84    |
| Y       | 0.67       | 0.64     |
| Ag      | 88.57      | 70.52    |
| Total   | 100.00     | 100.00   |

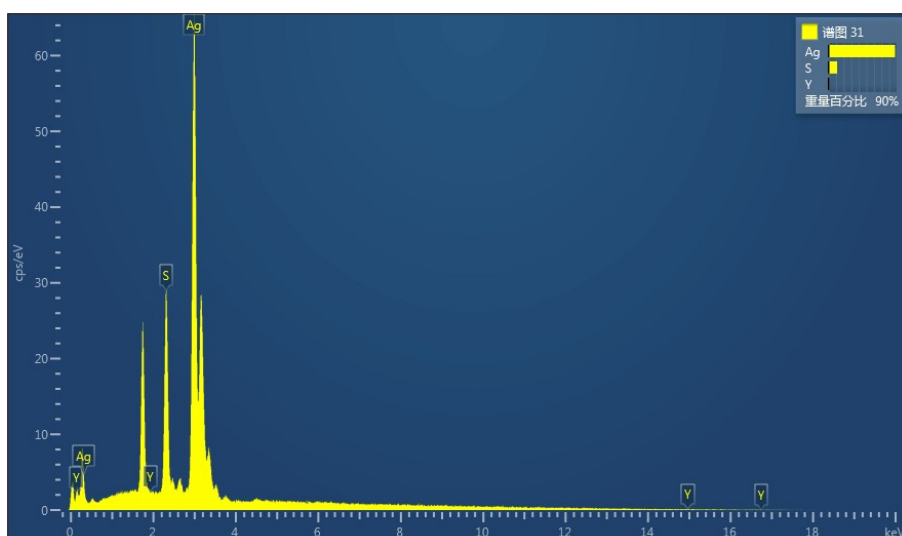

**Figure S4.** EDS spectrum of the monoclinic Ag<sub>2</sub>S:Y nanocrystals for the 0.20 molar ratio of Y<sup>3+</sup> and Ag<sup>+</sup> in the reaction solution.

**Table S4.** Element content percentage of the monoclinic Ag<sub>2</sub>S:Y nanocrystals for the 0.20 molar ratio of Y<sup>3+</sup> and Ag<sup>+</sup> in the reaction solution.

| Element | Weight (%) | Atom (%) |
|---------|------------|----------|
| S       | 11.37      | 30.10    |
| Y       | 0.92       | 0.88     |
| Ag      | 87.71      | 69.02    |
| Total   | 100.00     | 100.00   |

## 2. TEM analysis of the monoclinic Ag<sub>2</sub>S:Y nanocrystals

As shown in high-resolution transmission electron microscopy (HRTEM) image (Figure S5a) of the undoped Ag<sub>2</sub>S nanocrystals, the measured interplanar spacings of 0.308 nm and 0.258 nm are consistent with (111) and (022) lattice planes of the monoclinic Ag<sub>2</sub>S structure, respectively. The particle size of the pure Ag<sub>2</sub>S sample (Figure S5a) can be clearly distinguished and the average size is 30-32 nm. Moreover, there are some defects (denoted by white dotted circles) in the Ag<sub>2</sub>S nanocrystals, as shown in Figure S5a. The measured interplanar spacings (Figure S5(b-e)) for 0.41 atom%, 0.55 atom%, 0.64 atom% and 0.88 atom% Ag<sub>2</sub>S:Y nanocrystals are consistent with the corresponding lattice planes of the monoclinic Ag<sub>2</sub>S structure, and the observed particle sizes are also about 30-32 nm. As displayed in Figure S5, there are more defects in these Ag<sub>2</sub>S:Y nanocrystals in comparison to the pure Ag<sub>2</sub>S samples.

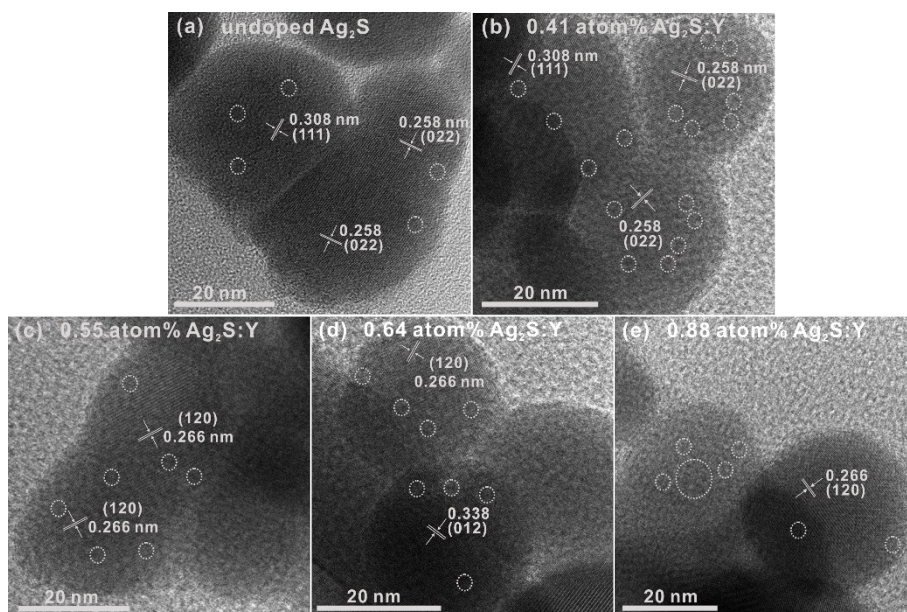

**Figure S5.** HRTEM image (a) undoped, (b) 0.41 atom%, (c) 0.55 atom%, (d) 0.64 atom% and (e) 0.88 atom  $Y^{3+}$  doped monoclinic  $Ag_2S$  nanocrystals (the white dotted circles denoted as the defect regions), respectively.

### 3. XPS analysis of the monoclinic $Ag_2S:Y$ nanocrystals

XPS analysis is to determine whether impurity elements such as N and magnetic impurities including Fe, Co, Ni are present and to determine the valence states of elements. For the pure and 0.64 atom% Y doped  $Ag_2S$  nanocrystals, it is obviously seen that no other impurities were detectable in the full XPS spectra of Fig. S6c and Fig. S6f, respectively. The two S 2p peaks (Figure S6a) correspond to S 2p<sub>3/2</sub> and S 2p<sub>1/2</sub> at 161.3 and 162.4 eV, respectively, manifesting that the S is in  $S^{2-}$  state.<sup>1</sup> In Ag 3d spectrum (Figure S6b), two peaks attributed to Ag 3d<sub>5/2</sub> and Ag 3d<sub>3/2</sub> at 368.2 and 374.2 eV indicate that Ag is in  $Ag^+$  state, in agreement with the reported value of  $Ag_2S$ .<sup>2</sup> Area analysis of the peaks suggests that the Ag/S ratio reaches 1.8 smaller than the ideal theoretical value of 2. The above analysis reveals that S is in excess and Ag is relatively

deficient in  $\text{Ag}_2\text{S}$ , probably because of the formation of sulfur antsite, Cd vacancy, and sulfur interstitial defects. For 0.64 atom% Y doped  $\text{Ag}_2\text{S}$  nanocrystals, there is some overlap in Figure S6d, due to the close binding energies of Y and S elements. The S  $2p_{3/2}$  and S  $2p_{1/2}$  peaks (Figure S6d) at 161.6 and 162.7 eV manifest that the S is in  $\text{S}^{2-}$  state. The fitted peak (Figure S6d) of Y  $3d_{5/2}$  at 158.5 eV manifests that Y is in  $\text{Y}^{3+}$  state,<sup>3</sup> excluding the possibility of Y metal clusters. The Ag  $3d_{5/2}$  and Ag  $3d_{3/2}$  peaks (Fig. S6e) at 368.8 and 374.7 eV suggest that Ag is in  $\text{Ag}^+$  state. The Ag/S ratio of 0.64 atom%  $\text{Ag}_2\text{S}:\text{Y}$  nanocrystals is 1.3 significantly smaller than that of the pure  $\text{Ag}_2\text{S}$  sample, which implies that the Y dopant is in favor of the sulfur antsite, Cd vacancy, and sulfur interstitial defects.

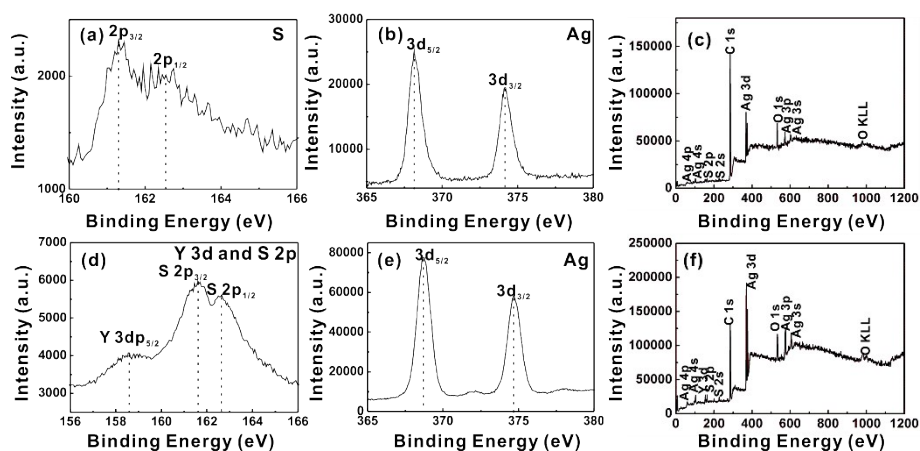

**Fig. S6** XPS spectra of (a-c) undoped and (d-f) Y doped  $\text{Ag}_2\text{S}$  nanocrystals. (a, d) Binding energy of Y 3d and S 2p regions; (b, e) binding energies of Ag 3d regions; (c, f) full scan spectra, respectively.

#### Reference

- 1 X. Yang, H. T. Xue, J. Xu, X. Huang, J. Zhang, Y.-B. Tang, T.-W. Ng, H.-L. Kwong, X.-M. Meng and C.-S. Lee, *ACS Appl. Mater. Interfaces*, 2014, **6**, 9078-9084.

- 2 W. Jiang, Z. M. Wu, X. N. Yue, S. J. Yuan, H. F. Lu and B. Liang, *RSC Adv.*, 2015, **5**, 24064-24071.
- 3 I. Gonzalo-Juan, J. A. Escribano, Y. Castro, A. J. Sanchez-Herencia, J. L. G. Fierro and B. Ferrari, *Green Chem.*, 2014, **16**, 3286-3296.
